# Supplementary material
Source: PubMed Central journal article supplement (PMC4580519)
Supplement: NIHMS706303-supplement-Supplemental_Digital_Content.pdf [file NIHMS706303-supplement-Supplemental_Digital_Content.pdf]

## Appendix 1. Changes in Nulliparous Term Singleton Vertex Cesarean Delivery Rates Predicted by Interrupted Time Series Analysis

|                                                 | Privately Insured        |                 | Publicly Insured         |                 |
|-------------------------------------------------|--------------------------|-----------------|--------------------------|-----------------|
|                                                 | Estimate                 | <i>p</i> -value | Estimate                 | <i>p</i> -value |
| Change in rate at the time of the expansion     | -6.9%<br>(-8.8% - -5.0%) | 0.001           | -2.7%<br>(-6.9% - 1.6%)  | 0.276           |
| Slope of line before expansion (per year)       | 0.6%<br>(0.3% - 0.9%)    | 0.011           | 1.2%<br>(0.5% - 1.9%)    | 0.024           |
| Slope of line after expansion (per year)        | -1.7%<br>(-2.8% - -0.5%) | 0.036           | -1.4%<br>(-3.8% - 1.1%)  | 0.32            |
| Difference in slopes before and after expansion | -2.3%<br>(-3.4% - -1.1%) | 0.011           | -2.5%<br>(-5.0% - -0.1%) | 0.098           |

Rosenstein MG, Nijagal M, Nakagawa S, Gregorich SE, and Kuppermann M. The association of expanded access to a collaborative midwifery and laborist model with cesarean delivery rates. *Obstet Gynecol* 2015;126.

The authors provided this information as a supplement to their article.

© Copyright 2015 American College of Obstetricians and Gynecologists.

## Appendix 2. Changes in Vaginal Birth After Cesarean Delivery Rates Predicted by Interrupted Time Series Analysis

|                                                 | Privately Insured       |                 | Publicly Insured         |                 |
|-------------------------------------------------|-------------------------|-----------------|--------------------------|-----------------|
|                                                 | Estimate                | <i>p</i> -value | Estimate                 | <i>p</i> -value |
| Change in rate at the time of the expansion     | 2.2%<br>(-3.2% - 7.5%)  | 0.47            | 4.3%<br>(-1.2% - 9.8%)   | 0.19            |
| Slope of line before expansion (per year)       | -0.4%<br>(-1.3% - 0.4%) | 0.38            | -2.1%<br>(-3.1% - -1.2%) | 0.007           |
| Slope of line after expansion (per year)        | 7.8%<br>(4.7% - 11.0%)  | 0.004           | -3.8%<br>(-6.9% - 0.6%)  | 0.07            |
| Difference in slopes before and after expansion | 8.3%<br>(5.1% - 11.4%)  | 0.004           | -1.7%<br>(-4.8% - 1.5%)  | 0.34            |

Rosenstein MG, Nijagal M, Nakagawa S, Gregorich SE, and Kuppermann M. The association of expanded access to a collaborative midwifery and laborist model with cesarean delivery rates. *Obstet Gynecol* 2015;126.

The authors provided this information as a supplement to their article.

© Copyright 2015 American College of Obstetricians and Gynecologists.

### Appendix 3. Changes in Short-Term Adverse Neonatal Outcome Rates\* Predicted by Interrupted Time Series Analysis

|                                                 | Privately Insured        |                 | Publicly Insured         |                 |
|-------------------------------------------------|--------------------------|-----------------|--------------------------|-----------------|
|                                                 | Estimate                 | <i>p</i> -value | Estimate                 | <i>p</i> -value |
| Change in rate at the time of the expansion     | 0.06%<br>(-0.9% - 1.1%)  | 0.91            | 0.90%<br>(-1.4% - 3.2%)  | 0.47            |
| Slope of line before expansion (per year)       | 0.07%<br>(-0.1% - 0.2%)  | 0.43            | -0.16%<br>(-0.5% - 0.2%) | 0.45            |
| Slope of line after expansion (per year)        | 0.66%<br>(0.05% - 1.3%)  | 0.088           | -0.71%<br>(-2.0% - 0.6%) | 0.32            |
| Difference in slopes before and after expansion | 0.58%<br>(-0.02% - 1.2%) | 0.11            | -0.54%<br>(-1.8% - 0.7%) | 0.44            |

\*Composite neonatal outcome includes 5 minute APGAR <7, umbilical artery pH<7.0, umbilical artery base excess >12.
